# Supplementary material for: Early Re-Exploration versus Conservative Management for Postoperative Bleeding in Stable Patients after Coronary Artery Bypass Grafting: A Propensity Matched Study
Source: MDPI journal article supplement (doi:10.3390/jcm12093327), 2023-05-07
Supplement: s1 [file s1]

**Supplementary Table S1. Propensity score, logistic regression.**

|                                                     | <b>Coefficient</b> | <b>Standard Error</b> | <b>P value</b> | <b>95% confidence interval</b> |           |
|-----------------------------------------------------|--------------------|-----------------------|----------------|--------------------------------|-----------|
| Age                                                 | 0.0108996          | 0.0081300             | 0.180          | -0.0050349                     | 0.0268341 |
| Male sex                                            | 0.1353242          | 0.2153787             | 0.530          | -0.2868102                     | 0.5574586 |
| Body surface area                                   | 0.3703407          | 0.2389886             | 0.121          | -0.0980683                     | 0.8387498 |
| Diabetes                                            |                    |                       |                |                                |           |
| diet                                                | 0.1500536          | 0.3382338             | 0.657          | -0.5128725                     | 0.8129797 |
| oral                                                | -0.1172776         | 0.2778239             | 0.673          | -0.6618025                     | 0.4272472 |
| insulin                                             | -0.0182513         | 0.3453902             | 0.958          | -0.6952037                     | 0.6587011 |
| Smoking                                             |                    |                       |                |                                |           |
| past                                                | 0.159199           | 0.1560541             | 0.308          | -0.1466615                     | 0.4650595 |
| current                                             | 0.4253758          | 0.2475137             | 0.086          | -0.0597422                     | 0.9104937 |
| Hypertension                                        | 0.1597344          | 0.1469703             | 0.277          | -0.1283222                     | 0.447791  |
| Hypercholesterolemia                                | -0.1817113         | 0.1467164             | 0.216          | -0.4692703                     | 0.1058476 |
| Preoperative dialysis                               | -1.197912          | 1.042455              | 0.251          | -3.241086                      | 0.8452624 |
| Pulmonary disease                                   | 0.0879688          | 0.2414984             | 0.716          | -0.3853593                     | 0.5612968 |
| Preoperative stroke                                 |                    |                       |                |                                |           |
| transient                                           | 0.2357526          | 0.3127236             | 0.451          | -0.3771743                     | 0.8486795 |
| stroke                                              | -0.439563          | 0.628682              | 0.484          | -1.671757                      | 0.792631  |
| Extracardiac arteriopathy                           | -0.2404877         | 0.2095109             | 0.251          | -0.6511215                     | 0.1701462 |
| Number of diseased vessels                          |                    |                       |                |                                |           |
| 2                                                   | 0.2825012          | 0.4934924             | 0.567          | -0.684726                      | 1.249728  |
| 3                                                   | 0.2215202          | 0.5053996             | 0.661          | -0.7690449                     | 1.212085  |
| Left main disease                                   | -0.0647119         | 0.1698154             | 0.703          | -0.3975439                     | 0.2681201 |
| Left ventricular ejection fraction (LVEF), category |                    |                       |                |                                |           |
| fair                                                | -0.0745296         | 0.1796082             | 0.678          | -0.4265552                     | 0.2774959 |
| poor                                                | -0.3687908         | 0.3746656             | 0.325          | -1.103122                      | 0.3655402 |
| Number of distal anastomosis                        |                    |                       |                |                                |           |
| 2                                                   | 0.1788944          | 0.526024              | 0.734          | -0.8520937                     | 1.209882  |
| 3                                                   | -0.2580031         | 0.5481954             | 0.638          | -1.332446                      | 0.8164402 |
| 4                                                   | -0.1076718         | 0.5591905             | 0.847          | -1.203665                      | 0.9883214 |
| 5                                                   | -0.2355873         | 0.6384012             | 0.712          | -1.486831                      | 1.015656  |
| On-pump surgery                                     | -0.0810754         | 0.1878733             | 0.666          | -0.4493002                     | 0.2871495 |

**Supplementary Table S2. Propensity score, diagnostic tests.**

| Variable             | Unmatched (U) | Mean              | %bias | %reduct | t-test            |
|----------------------|---------------|-------------------|-------|---------|-------------------|
|                      | Matched (M)   | Treated Control   |       | bias    | t-value / P-value |
| Age                  | U             | 65.789 / 64.978   | 8.3   |         | 1.23 / 0.219      |
|                      | M             | 65.789 / 66.175   | -3.9  | 52.3    | -0.43 / 0.667     |
| Male sex             | U             | 0.86056 / 0.84964 | 3.1   |         | 0.45 / 0.655      |
|                      | M             | 0.86056 / 0.86056 | 0.0   | 100.0   | 0.00 / 1.000      |
| Body surface area    | U             | 1.9664 / 1.9443   | 7.4   |         | 1.08 / 0.280      |
|                      | M             | 1.9664 / 1.9708   | -1.5  | 80.4    | -0.15 / 0.880     |
| Diabetes, diet       | U             | 0.04781 / 0.03669 | 5.5   |         | 0.84 / 0.399      |
|                      | M             | 0.04781 / 0.05578 | -4.0  | 28.3    | -0.40 / 0.688     |
| Diabetes, oral       | U             | 0.06773 / 0.07482 | -2.8  |         | -0.40 / 0.693     |
|                      | M             | 0.06773 / 0.04382 | 9.3   | -237.1  | 1.17 / 0.244      |
| Diabetes, insulin    | U             | 0.04382 / 0.04388 | -0.0  |         | -0.00 / 0.997     |
|                      | M             | 0.04382 / 0.03187 | 5.8   | 1957.1  | 0.70 / 0.484      |
| Smoking, past        | U             | 0.52191 / 0.50072 | 4.2   |         | 0.62 / 0.537      |
|                      | M             | 0.52191 / 0.53785 | -3.2  | 24.8    | -0.36 / 0.721     |
| Smoking, current     | U             | 0.11952 / 0.10000 | 6.2   |         | 0.94 / 0.349      |
|                      | M             | 0.11952 / 0.09960 | 6.4   | -2.0    | 0.71 / 0.476      |
| Hypertension         | U             | 0.59761 / 0.56259 | 7.1   |         | 1.03 / 0.303      |
|                      | M             | 0.59761 / 0.61355 | -3.2  | 54.5    | -0.36 / 0.716     |
| Hypercholesterolemia | U             | 0.50199 / 0.56331 | -12.3 |         | -1.80 / 0.072     |

|                                 |   |                   |      |        |               |
|---------------------------------|---|-------------------|------|--------|---------------|
|                                 | M | 0.50199 / 0.50199 | 0.0  | 100.0  | 0.00 / 1.000  |
| Preoperative dialysis           | U | 0.00398 / 0.01223 | -9.2 |        | -1.15 / 0.249 |
|                                 | M | 0.00398 / 0.00797 | -4.4 | 51.7   | -0.58 / 0.563 |
| Pulmonary disease               | U | 0.09562 / 0.08561 | 3.5  |        | 0.52 / 0.605  |
|                                 | M | 0.09562 / 0.09163 | 1.4  | 60.2   | 0.15 / 0.879  |
| Preoperative stroke, transient  | U | 0.05578 / 0.04676 | 4.1  |        | 0.61 / 0.539  |
|                                 | M | 0.05578 / 0.06375 | -3.6 | 11.6   | -0.38 / 0.707 |
| Preoperative stroke, stroke     | U | 0.01195 / 0.01655 | -3.9 |        | -0.54 / 0.592 |
|                                 | M | 0.01195 / 0.01195 | 0.0  | 100.0  | 0.00 / 1.000  |
| Extracardiac arteriopathy       | U | 0.13147 / 0.15252 | -6.0 |        | -0.86 / 0.390 |
|                                 | M | 0.13147 / 0.14343 | -3.4 | 43.2   | -0.39 / 0.698 |
| Number of diseased vessels, 2   | U | 0.22709 / 0.19065 | 9.0  |        | 1.34 / 0.181  |
|                                 | M | 0.22709 / 0.23904 | -2.9 | 67.2   | -0.32 / 0.752 |
| Number of diseased vessels, 3   | U | 0.73705 / 0.77122 | -7.9 |        | -1.18 / 0.240 |
|                                 | M | 0.73705 / 0.7251  | 2.8  | 65.0   | 0.30 / 0.763  |
| Left main disease               | U | 0.22709 / 0.23094 | -0.9 |        | -0.13 / 0.894 |
|                                 | M | 0.22709 / 0.21514 | 2.8  | -211.0 | 0.32 / 0.748  |
| LVEF, category "fair"           | U | 0.19522 / 0.19784 | -0.7 |        | -0.10 / 0.924 |
|                                 | M | 0.19522 / 0.20319 | -2.0 | -203.8 | -0.22 / 0.824 |
| LVEF, category "poor"           | U | 0.03586 / 0.04676 | -5.5 |        | -0.77 / 0.444 |
|                                 | M | 0.03586 / 0.03586 | 0.0  | 100.0  | 0.00 / 1.000  |
| Number of distal anastomosis, 2 | U | 0.24701 / 0.17842 | 16.8 |        | 2.56 / 0.011  |
|                                 | M | 0.24701 / 0.25100 | -1.0 | 94.2   | -0.10 / 0.918 |

|                                 |   |                   |       |        |               |
|---------------------------------|---|-------------------|-------|--------|---------------|
| Number of distal anastomosis, 3 | U | 0.39841 / 0.45540 | -11.5 |        | -1.67 / 0.095 |
|                                 | M | 0.39841 / 0.40637 | -1.6  | 86.0   | -0.18 / 0.856 |
| Number of distal anastomosis, 4 | U | 0.27888 / 0.28417 | -1.2  |        | -0.17 / 0.864 |
|                                 | M | 0.27888 / 0.24701 | 7.1   | -502.7 | 0.81 / 0.418  |
| Number of distal anastomosis, 5 | U | 0.04382 / 0.05180 | -3.7  |        | -0.53 / 0.596 |
|                                 | M | 0.04382 / 0.05578 | -5.6  | -49.9  | -0.61 / 0.539 |
| On-pump surgery                 | U | 0.81275 / 0.84101 | -7.5  |        | -1.11 / 0.265 |
|                                 | M | 0.81275 / 0.84861 | -9.5  | -26.9  | -1.07 / 0.285 |

| Sample    | PsR2 / LRchi2 | Mean bias | Med bias | Rubin's B | Rubin's R |
|-----------|---------------|-----------|----------|-----------|-----------|
| Unmatched | 0.019 / 25.99 | 6.1       | 5.5      | 35.2      | 0.97      |
| Matched   | 0.011 / 7.37  | 3.5       | 3.2      | 24.2      | 0.89      |
